# Supplementary material for: Post-fire dynamics of ectomycorrhizal fungal communities in a Scots pine (Pinus sylvestris L.) forest of Poland
Source: PeerJ. 2021 Sep 15;9:e12076. doi: 10.7717/peerj.12076 (PMC8449530; doi:10.7717/peerj.12076)
Supplement: Supplemental Information 1 — These data were used for statistical analysis to compare study sites. [file peerj-09-12076-s001.xlsx]

## Sheet: Mycorrhizae
Site	Sample	NV	NM	VM	Phialocephala fortinii	Thelephora terrestris	Russula badia	Imleria badia	Russula turci	Lactarius plumbeus	Russula paludosa	Hyaloscypha variabilis	Russula vesca
Control	2		37	106	0	0	0	10	0	0	0	96	0
Control	11	5	4	49	0	46	0	3	0	0	0	0	0
Control	24		3	67	0	12	0	25	20	10	0	0	0
Control	25	36	5	271	169	96	0	0	6	0	0	0	0
Control	51	27	98	104	11	57	0	8	0	28	0	0	0
Control	54	72	75	106	1	24	47	9	0	1	4	20	0
Control	57	15	32	133	0	66	13	44	0	6	0	4	0
Control	58	17	12	62	0	19	0	14	0	1	25	3	0
Control	101	12	28	14	0	9	0	3	0	0	2	0	0
Control	104	33	41	19	0	0	0	8	0	0	9	2	0
Control	106	38	35	28	0	4	2	18	0	0	4	0	0
Control	107	58	33	25	0	17	0	8	0	0	0	0	0
Control	2	13	13	23	0	17	6	0	0	0	0	0	0
Control	11	25	24	57	0	32	14	3	0	0	0	0	8
Control	24	8	12	27	2	21	0	0	0	0	4	0	0
Control	25	6	21	12	0	12	0	0	0	0	0	0	0
Control	51	45	33	41	0	11	13	0	1	0	0	0	16
Control	54	2	24	24	3	5	0	16	0	0	0	0	0
Control	57	25	5	9	0	2	0	0	0	0	7	0	0
Control	58	18	16	8	0	8	0	0	0	0	0	0	0
Control	101	9	35	37	0	14	0	3	3	0	17	0	0
Control	104	18	15	31	15	12	4	0	0	0	0	0	0
Control	106	5	16	6	0	5	0	0	0	0	1	0	0
Control	107	26	44	26	0	0	0	8	0	13	0	0	5
Burned	1	5		10	0	10	0	0	0	0	0	0	0
Burned	17	16		13	0	6	0	7	0	0	0	0	0
Burned	22	30		85	5	21	0	23	2	34	0	0	0
Burned	52	27	22	58	36	10	4	8	0	0	0	0	0
Burned	53	94	31	116	18	87	0	10	0	0	0	1	0
Burned	56	44	3	58	13	22	0	14	0	3	0	6	0
Burned	102	45	51	39	3	22	3	0	0	10	0	1	0
Burned	103	30	23	59	2	23	3	5	0	17	5	4	0
Burned	108	179	209	99	0	9	0	82	0	0	0	8	0
Burned	109	38	36	19	0	9	0	9	1	0	0	0	0
Burned	1a	37	35	17	0	14	0	1	0	2	0	0	0
Burned	1b		22	28	24	1	3	0	0	0	0	0	0
Burned	1	9	6	12	0	0	0	1	0	0	3	8	0
Burned	17	11	18	26	0	0	0	17	0	0	9	0	0
Burned	22	26	58	39	0	0	0	8	13	13	0	0	5
Burned	52	30	14	13	0	9	0	0	0	0	4	0	0
Burned	53	19	13	10	0	0	0	8	0	0	0	2	0
Burned	56	20	17	35	0	0	0	0	0	0	31	4	0
Burned	102	28	12	20	0	0	18	0	0	0	2	0	0
Burned	103	16	16	28	0	6	0	5	2	3	12	0	0
Burned	108	14	13	10	0	0	0	8	0	0	0	2	0
Burned	109	16	11	17	3	4	0	9	0	1	0	0	0
Burned	1a	15	6	3	0	0	0	0	0	0	3	0	0
Burned	1b	27	16	16	0	0	0	11	0	0	5	0	0

## Sheet: Soil
Sample	Site	pHH2O	N-NH4 (mg/l)	P (mg/l)	K (mg/l)	Ca (mg/l)	Mg (mg/l)	Cl (mg/l)	C-org (%)
2	Control	4.29	10	7	20	131	13	35	0.47
11	Control	4.42	10	9	22	131	14	40	0.46
24	Control	4.2	12	18	51	104	14	35	0.47
25	Control	4.03	12	9	21	90	11	34	0.7
51	Control	4.25	12	5	20	122	16	32	0.62
54	Control	4.28	12	5	23	83	12	42	0.7
57	Control	4.12	19	5	23	105	15	38	1.6
58	Control	4.21	11	5	20	96	12	37	0.62
101	Control	4.2	11	5	20	89	11	39	0.96
104	Control	4.37	13	5	27	81	11	40	0.6
106	Control	5.15	12	5	20	66	11	30	0.76
107	Control	4.13	10	5	20	71	10	29	1.03
1a	Burned	4.33	10	5	26	97	12	36	0.85
1	Burned	4.31	9	7	20	82	10	30	0.56
1b	Burned	4.35	9	5	20	85	11	28	0.49
17	Burned	4.2	16	5	21	60	10	35	1.18
22	Burned	4.45	17	5	20	115	16	33	0.78
52	Burned	4.48	10	5	20	59	10	20	0.84
53	Burned	4.65	15	5	31	76	10	31	0.39
56	Burned	4.71	10	5	20	83	10	32	0.32
102	Burned	4.35	11	5	22	64	10	37	1.08
103	Burned	3.97	14	5	29	77	12	40	1.46
108	Burned	4.78	13	10	20	84	11	32	0.32
109	Burned	4.76	12	9	21	83	10	31	0.34
